# Supplementary material
Source: Springer Nature journal article supplement (https://www.springermedizin.de/resource/supplementary/12885_2010_2465_MOESM5_ESM.pdf/9461364)

# Whole genome analysis

Microarray analysis

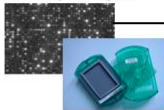

27,868 genes

Microarray validation

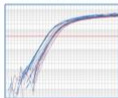

356 genes

Expression analysis of patients' samples

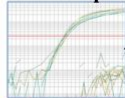

96 genes

6-gene panel for CTC detection

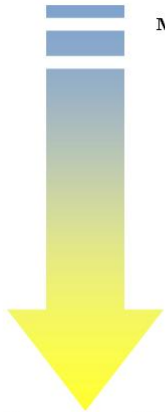

Supplement: MOESM5 [file 9461364]
